# Supplementary figures and images for: Phytogenic magnetic nanoparticles for wastewater treatment: a review
Source: Royal Society of Chemistry journal article supplement (doi:10.1039/c7ra04738j), 2017-01-01

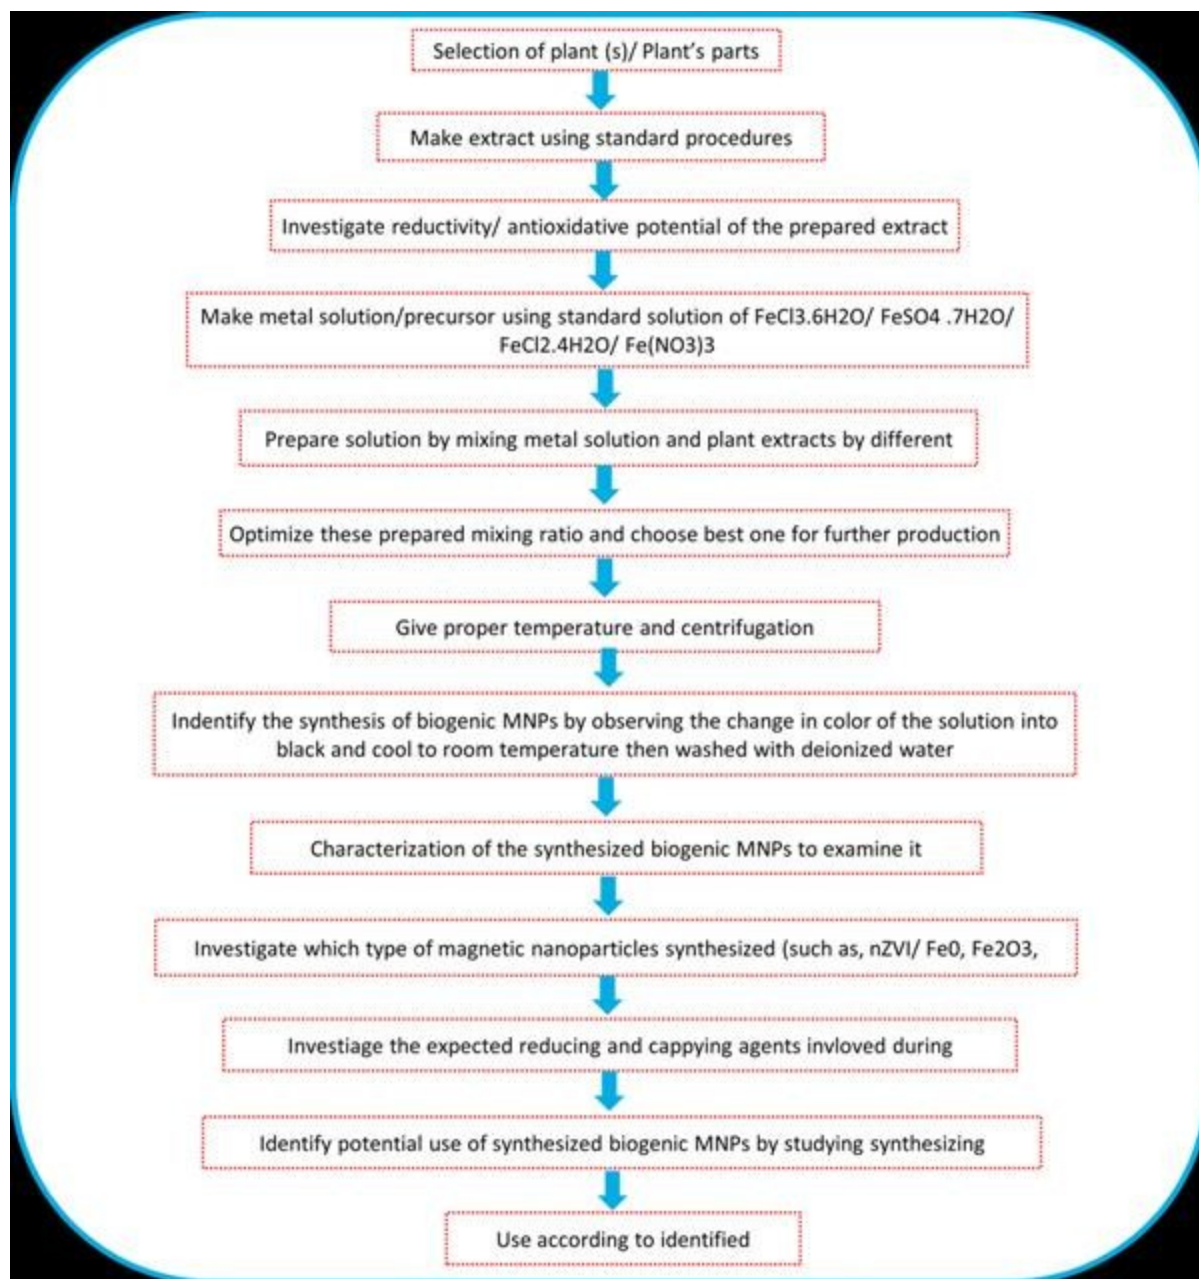

Figure S1. General fabrication protocols of phyto-genetic magnetic nanoparticles (PMNPs)

Supplement: c7ra04738j1.pdf [file c7ra04738j1.pdf]
